# Supplementary material for: Taxonomy, Phylogeny, Divergence Time Estimation, and Biogeography of the Family Pseudoplagiostomataceae (Ascomycota, Diaporthales)
Source: MDPI journal article supplement (doi:10.3390/jof9010082), 2023-01-05
Supplement: s1 [file s1]

[illegible]



-----  
-----  
-----GAGGGTATGTATTTCATCTGTTCTCTAT---ATTCTGATTCTCCCAA---  
GGGACATTCGTGT-----GATTGCGAACG-----  
GTTGCGACCTGCTTTGCAGTCGTTTGTGCGCCTCCCTTTTTGCCCTGTCCCACCACAT-  
TTTCGCTTTTTTGGTGCGGGG-TTTCGTGGGTCTTATCTTG-GATAAACGTGACCCGCT-----  
CAACCCAGCCAGAGAATTCATTACTATGGCCCTCCKCCATGTACACACAGACCCCTCCCCAACGCCGT  
C----AATCGTCGTCGCTACAATGACATCGTGCTAACTT-  
AATTTGCACCATAGCCGCCGAGCTCGGTAAGGGTTCCTTCAAGTACGCCTGGGTCCTTGACAAGCTCAAG  
GCCGAGCGTGAGCGTGGTATCACCATCGACATTGCTCTGTGGAAGTTCGAGACTCCCAAGTACTATGTCA  
CCGTCATTGGTATGTTCTATGCTTCCGTGGCTTTTGCAAGCCGACATGCAAGCTTGACAAGTGTCCAATT  
TCAACGCATTGTACTAATGACAACGCCATAGACGCTCCCGGTCACCGTGACTTCATCAAGAACATG-----  
-----  
-----  
-----  
-----  
-----  
-----

>Apharknessia\_eucalypti\_CBS\_142518  
CGAGTGAAGCGGCAACAGCTCAAATTTGAAATCTGGCCTCGT-  
GCCCAGATTGTAATTTGCAGAGGATGTTTCTGGCGCGGTGCCGTCCGAGTTTCCTGGAACGGAACGCCAA  
AGAGGGTGAGAGCCCGTATGGTCGGACCAAGCCTGTGTGAAACTCCTTCGACGAGTCGAGTAGTTTG  
GGAATGCTGCTCTAAATGGGAGGTAAATCTCTTCTAAAGCTAAATACCGCCAGAGACCGATAGCGCACA  
AGTAGAGTGATCGAAAGATGAAAAGCACCTTGAAAAGGGGGTTAAACAGTACGTGAAATTGTTGAAAGGG  
AAGCGTTTGTGACCAGACTTGTGCCAGGCGGCTCATCCGGCGTTCTCGCCGGTGCACTCCGCCTGTGCTC  
AGGCCAGCATCGGTTCTCGTGGGGGAGAAGAGCGATGGGAATGTGGCTCACCTCGGGTGAGTGTTATA  
GCCCCGCCGACGATGCCCCCGTGGGGACCGAGGTTTCGCGCTTCC-----  
GCATGGATGCTGGCGTAATGGTCACTAGCGACCCGTCTTGAAACACGGACCAAGGAGTCGTCCATTAGAG  
CGAGCGTTTGGGTGTCAAACCCGCACGCGTAATGAAAGTGAAAT-----  
TAGGTGAGAGCTTCGGCGCATCATCGACCGATCCTGATGTTCTCGGATGGATTGAGTAAGAGTTTAAAC  
GGACGGACCCGAAAGACAGTGAAGTATGCTTGTATAGGTTGAAGCCAGAGGAAACTCTGGTGGAGGCTCG  
CAGCGGTTCTGACGTGCAAATCGATCGTCAAATATGAGCATGGGGGCGAAAGACTAATCG-----  
-----AACCAGCGGAGGGATCATTGCTGGAA-GCGTCGCAAGACGCGCCAG---  
ATCACCCCTATGTGAACCTATA----  
TTATCGTTGCCTCGGTCAAGGCTGGGTCTCTCTGAGATCCCCTCTCTGCGGTCTCTCCTTCCTTCGGGA  
AGGGAGGGACGACAGGAGGAG-CCGCCGGCCGTTGGCCC-----TTTAACTCTTG-TCTCCATCTGG--  
-ATTCTTCTGAGTATAAACAAAC---  
AAATGAATCAAACTTTCAACAACGGATCTCTTGGTCTGGCATCGATGAAGAACGCAGCGAAATGCGAT  
AAGTAATGTGAATTGCAGAATTCAGTGAATCATCGAATCTTTGAACGCACATTGCGCCCGCTGGTATTCC  
AGCGGGCATGCCTGTTTCGAGCGTCATTCAACCCCTC-----AAGCCCAG-----  
---CTTGGTGTGGGACATT--GCCA--TCTTCGTCCATCTTCTGGATGCACGA-----  
GGGCAAGTCCTCAAATTGAGTGGCGAGCTCGCCAGGA---CTCCGAGCGTAGTAGTTT-----

TACCACCTCGCTT--TGGACGGACTGGCGGTGCCTCAGCCGTAAAA--  
CCCCCAATTTATTACCAAAGGTTGACCTCGGATCAGGTAGGAATACCCGCTGAACTTAA-----

CCTTCTGGTGTGTACACACAGCTTACAGGCCACACCGCTCGATCGGGACGGCGGTGTTTTGGTATCGT  
 GACATTGTTACTGACCTCAATTGCAGGCAAACCATCTCTGGCGAGCACGGCCTCGACAGCAATGGTGTGT  
 ACGTG-----TCAACCCTCCATACCTTCTTGACACTTGTCT--GC--CTTCGAGACTGACCT-  
 CGCCGCAGTTACAACGGCACCTCCGAGCTGCAGCTCGAGCGCATGAACGTCTACTTCAACGAGGTATGTC  
 GA-----

>Apharknessia\_eucalyptorum\_CBS\_142519

AGATCCCCTCTCTGACATCCCCTCCTCCCTCGGGAGGGGAGGACGGACGAAGAGGAGCCGCCGCCGTTG  
GCCC-----TTTACACTCTTG-TCTCCATCTGG---ATTTCTTCTGAGTATAAACAAAC---  
AAATGAATCAAACTTTCAACAACGGATCTCTTGGTTCTGGCATCGATGAAGAACGCAGCGAAATGCGAT  
AAGTAATGTGAATTGCAGAATTCAGTGAATCATCGAATCTTTGAACGCACATTGCGCCCGCTGGTATTCC  
AGCGGGCATGCCTGTTTCGAGCGTCATTCAACCCTC-----AAGCCCAG-----  
---CTTGGTGTGGGACATT--GCCATCTCG---TCCATCTTCTGGATGCGCGA-----  
GGGCAAGTCCTCAAATTGAGTGGCGAGCTCGCCAGGA---CTCCGAGCGTAGTAGTTT-----  
TACCACCTCGCTT--TGGACGGACTGGCGGTGTCTCGGCCGTAAAA--  
CCCCCAATTTATTACCAAAGGTTGACCTCGGATCAGGTAGGAATACCCGCTGAACTTAA-----

CCTTCTGGTGTGTACACACAGCTTCACGGCCGCACCGCGTCGATCGGGCACGGCGGTGTTTTGTTATCGT  
GACATTGTTACTGACCTCAATTGCAGGCAAACCATCTCTGGCGAGCACGGCCTCGACAGCAATGGTGTGT  
ACGTG-----TTAACCCTCCATACCTTCTTGACACTTGTCT--GC--CTTGGAGACTGACCT-  
CGCCGAGTTACAACGGCACCTCCGAGCTGCAGCTCGAGCGCATGAACGTCTACTTCAACGAGGTATGTC  
GGTTGGCATTACGAACCCACCCCTCCCGCCGCTTTTCGCGTGACAGGTGATCTCGACTGCTTGAT  
TAGTATGTCTGACGCGCT-----  
GTTGTACAGGCCTCCGGCAACAAGTATGTTCTCGCGCTGTTCTTGTGACCTCGAGCCCGGTACCATGG  
ACGCTGTCCGCGCTGGTCTTTTGGCCAGCTGTTCCGCCCCGACAACTTCGTCTTCGGCCAGTCCGGTGC  
CGGCAACAACCTGGGCCAAGG

>Lasmenia\_sp\_LMS\_2011b\_CBS\_124122

CGAGTGAAGCGGCAACAGCTCAAATTTGAAATCTGGCCTCGCGGCCGAGTTGTAATTTGCAGAGGATGC  
TTCTGGCGCGGTGCCTTCCGAGTTCCCTGGAACGGGACGCCACAGAGGGTGAGAGCCCGTCTGGTGGGA  
CACCAAGCCTGTGTGAAGCTCCTTCGACGAGTCGAGTAGTTTGGGAATGCTGCTCTAAATGGGAGGTAAA  
TCTCTTCTAAAGCTAAATACCGCCAGAGACCGATAGCGCACAAGTAGAGTGATCGAAAGATGAAAAGCA  
CCTTGAAAAGGGGGTTAAACAGTACGTGAAATTGTTGAAAGGAAGCGCTTGTGACCAGACGTGCGCCCG  
GCGGCTCATCCAGCGTTCGCGCTGGTGCACTCCGCCG-  
GCGCAGGCCAGCATCGGTTTCGGCGGGGGGAGAAGGACGGCAGGAATGTGGCTCCCTCCGGGGGAGTGT

This image shows a full page of primary-ruled paper. It features multiple sets of horizontal dashed lines, each set consisting of three lines (top solid, middle dashed, bottom solid). These sets are repeated down the page, providing a guide for letter height and placement. The paper is otherwise blank, with no text or other markings.

CGAGTGAAGCGGCAACAGCTCAAATTTGAAATCTGGCCTCGCGCCCGAGTTGTAATTTGCAGAGGATGC  
TTCTGGCGCGGTGCCTTCCGAGTTCCTTGGAACGGGACGCCACAGAGGGTGAGAGCCCCGCTCTGGTGGGA  
CACCAAGCCTGTGTGAAGCTCCTTCGACGAGTCGAGTAGTTTGGGAATGCTGCTCTAAATGGGAGGTAAA  
TCTCTTCTAAAGCTAAATACCGGCCAGAGACCGATAGCGCACAAGTAGAGTGATCGAAAGATGAAAAGCA  
CCTTGAAAAGGGGGTTAAACAGTACGTGAAATTGTTGAAAGGAAGCGCTTGTGACCAGACGTGCGCCCC  
GCGGCTCATCCAGCGTTCGCGCTGGTGCCTCCGCCGG--  
GCGCAGGCCAGCATCGGTTTTCGGCGGGGGGAGAAGGACGGCAGGAATGTGGCTCCCCTCCGGGGGAGTGT  
TATAGCCTGCCGTACGATGCCCCGCGGGGACCGAGGACCGCGCTGTCAAAGCAAGGATGCTGGCGTAA  
TGTTACTAGCGACCCGTCTTGAAACACGGACCAAGGAGTCGTCCATTGGAGCGAGCGTTTGGGTGTCAA  
ACCCGCACGCGCAATGAAAGTGAAATTTCTATAGGTGAGAGCCTCGGCGCATCATCGACCGATCCTGATG  
TTCTCGGATGGATTTGAGTAAGAGTTTCAACGGACGGACCCGAAAGACAGTGAACATATGCTTGATAGGG  
TGAAAGCCAGAGGAAACTCTGGTGGAGGCTCGCAGCGGTTCTGACGTGCAAATCGATCGTCAAATATGAGC  
ATGGGGGCGAAAGACTAATCGAACTGTCTAGTA-----  
AGGGATCATTGCTGGAA-GCGCCGCCAGGCGCGCCCTGCACCTTTACCCGATGTGAACCTATACC---  
CACCGTTGCCCTCGGTGC-GGCCGGGTGCCCTCGCGCACCCCCAACCTGCCCTTCCCCCTCCCCG-  
GGGGCGGGAGCGGCGAGGGAGC--CGGCCCGCGGTTGGCCCCAACTCCAAACCTCTTG-  
TTTGTTCCAAACCTGTACCTTCTGAGTT-  
GATTTTACAAAAATGAATCAAACTTTCAACAACGGATCTCTTGGTTCGGCATCGATGAAGAACGCAG  
CGAAATGCGATACGTAATGTGAATTGCAGAATTCAGTGAATCATCGAATCTTTGAACGCACATTGCGCCC  
GCTGGTATTCCAGCGGGCATGCCTGTTTCGAGCGTCATTTCAACCCCTCCGGACACCCGCGCCCTCGTGG  
TGCGTGTGTGTGCTCCGGGTGTTGGGGCACT--GCCG---TGCTTTGTGCTTTGGCACGA-----  
----CGGCAGGCCCTCAAATGCAGTGGCGAGCCCGCTGGCACACCTCCGAGCGCAGTAACCT-----  
ACACCTCTCGCTT-CTGGACGGTCCAGCGGTTGCCCGGCCGTAAAA--CCCCCACAAC-----

>Lasmenia\_sp\_LMS\_2011a\_CBS\_124126

CGAGTGAAGCGGCAACAGCTCAAATTTGAAATCTGGCCTCGCGGCCCGAGTTGTAATTTGCAGAGGATGC  
TTCTGGCGCGGTGCCTTCCGAGTTCCCTGGAACGGGACGCCACAGAGGGTGAGAGCCCGTCTGGTGGGA  
ACCAAGCCTGTGTGAAGCTCCTTCGACGAGTCGAGTAGTTTGGAATGCTGCTCTAAATGGGAGGTAAA  
TCTCTTCTAAAGCTAAATACCGGCCAGAGACCGATAGCGCACAAGTAGAGTGATCGAAAGATGAAAAGCA  
CCTTGAAAAGGGGGTTAAACAGTACGTGAAATTGTTGAAAGGGAAGCGCTTGTGACCAGACGTGCGCCCCG  
GCGGCTCATCCAGCGTTCGCGCTGGTGCACTCCGCCGG--  
GCGCAGGCCAGCATCGGTTTCGGCGGGGGGAGAAGGACGGCAGGAATGTGGCTCCCTCCGGGGGAGTGT  
TATAGCCTGCCGTACGATGCCCCGCGGGGACCGAGGACCGCGCTGTCAAAGGCAAGGATGCTGGCGTAA  
TGTTACTAGCGACCCGCTCTTGAAACACGGACCAAGGAGTCGTCCATTGGAGCGAGCGTTTGGGTGTCAA  
ACCCGCACGCGCAATGAAAGTGAAATTTCTATAGGTGAGAGCCTCGGCGCATCATCGACCGATCCTGATG  
TTCTCGGATGGATTTGAGTAAGAGTTTCAACGGACGGACCCGAAAGACAGTGAACCTATGCTTGTATAGGG  
TGAAGCCAGAGGAACTCTGGTGGAGGCTCGCAGCGGTTCTGACGTGCAAATCGATCGTCAAATATGAGC  
ATGGGGGCGAAAGACTAATCGAACTGTCTAGTA-----  
AGGGATCATTGCTGGAA-GCGCCGCCAGGCGCGCCCTGCACCTTTACCCGATGTGAACCTATAACC---  
CACCGTTGCCTCGGTGC-GGCCGGGTGCCCTCGCGCACCCCCAACCTGCCCCCTCCCCCTCCCCG-  
GGGGCGGGAGCGGCGAGGGAGC--CGGCCCGCGTTGGCCCCAACTCCAAACCTCTTG-  
TTTGTTCCAAACCTGTACCTTCTGAGTT-  
GATTTTACACAAAATGAATCAAACTTTCAACAACGGATCTCTTGGTTCTGGCATCGATGAAGAACGCAG  
CGAAATGCGATACGTAATGTGAATTGCAGAATTCAGTGAATCATCGAATCTTTGAACGCACATTGCGCCC  
GCTGGTATTCCAGCGGGCATGCCTGTTTCGAGCGTCATTCAACCCCTCCGGACACCCCGCGCCCTCGTGG  
TGCGTGTGTGTCTCCGGGTGTTGGGGCACT--GCCG----TGCTTTGTGCTTTGGCACGA-----  
----CGGCAGGCCCTCAAATGCAGTGGCGAGCCCGCTGGCACACCTCCGAGCGCAGTAACCT-----  
ACACCTCTCGCTT-CTGGACGGTCCAGCGGTTGCCCGGCCGTAAAA--CCCCCCAAC-----





>Pseudoplagiostoma\_corymbiae\_CBS\_132529  
CGAGTGAAGCGCAACAGCTCAAATTTGAAATCTGGCTTCG--  
GCCCCGAGTTGTAATTTGCAGAGGATGCTTCTGGCGCGGTGCCTTCCGAGTTCCCTGGAACGGGACGCCAT  
AGAGGGTGAGAGCCCCGTATGGATGGACACCAAGCCTGTGTGAAGCTCCTTCAACGAGTCGAGTAGTTTG  
GGAATGCTGCTCTAAATGGGAGGTAAATCTCTTCTAAAGCTAAATACCGGCCAGAGACCGATAGCGCACA  
AGTAGAGTGATCGAAAGATGAAAAGCACCTTAAAAAGGGGGTTAAATAGTACGTGAAATTGTTGAAAGGG  
AAGCGCTTGTGACCAGACTTGCGCCAGGCGGCTCATCCGGGGTTCTCCCCGGTGCCTCCGCCCTG-  
GCTCAGGCCAGCATCGGTTCTTGTGGGGGGACAAGAGCAGTGGAACGTAGCTC-CCTACGGG-  
GAGTGTTATAGCCCACTGTACGATACCCTCGCGGGGACCGAGGACCGCGCTTCG----  
GCAAGGATGCTGGCGTAATGGTCACCAGCGACCCGTCTTGAAACACGGACCAAGGAGTCGTCCATTAGAG  
CGAGCGTTTGGGTGTCAAACCCGCACGCGTAATGAAAGTGAAAT-----  
TAGGTGAGAGCTTCGGCGCATCATCGACCGATCCTGATGTTCTCGGAYGGATTGAGTAAGAGTTTAAAC  
GGACGGACCCGAAAGACAGTGAACTATGCTTGATAGGGTGAAGCCAGAGGAAACTCTGGTGGAGGCTCG  
CAGCGGTTCTGACGTGCAAATCGATCGTCAAATATGAGCATGGGGGCGAAAGACTAATCGAACTGTCTAG  
TATCTCCGTTGGTGAACCAGCGGAGGGATCATTGCTGGAA-GCGTCTCACGGCGCACCCAG---AT--  
ACCCTTTGTGAACCTGTACC--CTTCTGTTGCCCTCGGCGCAGGCTGGGCGCTTCCACACGCCCCC--  
ACGCAGGCCTCAACCCCTGTGCGGAGC-----CAGCCGGCCGGTGGCCCACA--  
ACCCAACCTCTTG-TTTTTACCCA-CCCGTCTC-TCTGAGTA-ACCAAAAC---  
AAATGAATCAAACTTTCAACAACGGATCTCTTGTTCTGGCATCGATGAAGAACGCAGCGAAATGCGAT  
AAGTAATGTGAATTGCAGAATTCAGTGAATCATCGAATCTTTGAACGCACATTGCGCCCCTGGTATTCC  
AGCGGGCATGCCTGTTGAGCGTCATTTACCCCTC----AAGCTCCG-----  
---CTTGGTGTGGGGCACT--GCCG-----CGCCGCTTCGGCG-----  
GGGCAGGCCCCCAATCCAGTGGCGAGCTCGCCAGGA---CTCCGAGCGTAGTAGTT-----  
ATTACCTCGCTA--TGGACGGACTGGCGGTGCTT-TGCCGTTAAA--CCCCCCTTTCTG--



ACCAAACTCTTG-TTTTAC--AACCCGTCTC-TCTGAGCA-ACCAAAAC---  
 AAATGAATCAAACTTTCAACAACGGATCTCTTGGTTCTGGCATCGATGAAGAACGCAGCGAAATGCGAT  
 AAGTAATGTGAATTGCAGAATTCAGTGAATCATCGAATCTTTGAACGCACATTGCGCCCGCTGGTATTCC  
 AGCGGGCATGCCTGTTTCGAGCGTCATTTACCCCTC---AAGCTCCG-----  
 ---CTTGGTGTGGGGCACT--GCCG-----CGCCGCTTCGGCG-----  
 AGGCAGGCCCCAAATGCAGTGGCGGGCTCGCCAGGA---CTCCGAGCGTAGTAGTT-----  
 ATTCACCTCGCTA--TGGACGGACTGGCGGTGCTT-TGCCGTTAAA--CCCCCAATTTCT----  
 GAAAAGTGACCTCGGG-----

-----GAAGGTATGTGTCAAGATCTCCATTT---GTATCAATCCTACATC---  
CCGAATTTTAC--TTTGAACG--AG--TCCAGCATGTC---ATAGCAACCTGGACCGCTGT-  
GTTTCTCATTCATTCATTTTTTATCCGCGGGGCGCACATTTTGGATTTTTTGGTGCGGGG-  
TTTGAGCACCTC-TATCTTT-GATAAGCGTGACCCGCCTCG--CAACACTATCCAGAA-----CTCGCT-  
TGCCCCGCCATCACATTTTC-----TA-CCCCCTGCATTGTTT---CATTGGCAGAAC-----  
GTGATACTGACTG-ACTTATCATTATAGCCGCTGAGCTCGGTAAGGGTTTCCTTCAAGTA-----

-----CTTTCTGGTGCCTACTCGA--CCTCGT-----CACCACGTCGATCGA-----  
CGCGACATAAAGATTCCGCGATTGTGATACTGATTCCAATTCTAGGCAGACCATTCTGGTGAGCACGGC  
CTTGATAGCAATGGCGTGTACGTA-----CCTACCATCC--CATCCTCGCG-----  
CGTCAGGACCTCCCCAAACTGACCT--  
CAGCTTAGCTACAACGGTACCTCCGAGCTCCAGCTCGAGCGTATGAACGTCTACTTCAACGAGGTATGTC  
CACAT-----CGAGA-----TCTCATCAATCTCGAA--  
TTGAATACGAATTTACCCTATCGCCGAGCT--TTT-TCTGACGCGCT---  
TCCATCATCCAGGCATCCGGCAACAAATATGTTCTCTCGCGCCGTCTTGTCGATCTCGAGCCCGGTACCA  
TGGACGCCGTCCGTGCCGGTCTTTTCGGACAGCTGTTCCGTCCCGACAACCTTCGTTTTCGGTTCAGTCC--  
GTGCTGGCA--CACTGGGCCAAGGT

-----G-----  
 GCCCGAGTTGTAATTTGCAGAGGATGCTTCTGGCGCGGTGCCTTCCGAGTTCCTGGAACGGGACGCCAT  
 AGAGGGTGAGAGCCCCGATGGATGGACACCAAGCCTGTGTGAAGCTCCTTCAACGAGTCGAGTAGTTTG  
 GGAATGCTGCTCTAAATGGGAGGTAAATCTCTTCTAAAGCTAAATACGGCCAGAGACCGATAGCGCACA  
 AGTAGAGTGATCGAAAGATGAAAAGCACCTTAAAAAGGGGGTTAAATAGTACGTGAAATTGTTGAAAGGG  
 AAGCGCTTGTGACCAGACTTGCGCCAGGCGGCTCATCCGGGGTTCTCCCCGGTGCCTCCGCGCTG-  
 GCTCAGGCCAGCATCGGTTCTTGTGGGGGGATAAGACCAGTGGGAACGTAGCTC-CCTACGGG-

[illegible]

-----GAAGGTATGTGTCAAGATCTCCATTT---GTATCAATCCTACATC--  
CCGAATTTCACTTTTGAACG--AG--GTCAGCATGTC---ATAGTATCCTGGACCGCTGT-  
GTTTCTCATCTACTCATTTTTTATCCGCGGGGCGCACATTTTGGATTTTGGTGCGGGG-  
TTTGAGCACCTC-TATCTTT-GATAAGCGTGACCCGCCTCG--CAACACTATCCAAAA-----CTCGCT-  
TGCCCCGCCATCACATTTTC-----TA-CCCCCTGCATTGTTT---CATTTGCAGAAC-----  
GTGATACTGACTG-ACTTATCATTATAGCCGCTGAGCTCGGTAAGGGTTCTTCAAGTA-----



-----GAAGGTATGTGTCAAGATCTCCATTT---GTATCAATCCTACATC---  
CCGAATTTCACTTTTGAACG--AG--GTCAGCATGTC---ATAGTATCCTGGACCGCTGT-  
GTTTCTCATCTACTCATTTTTTATCCGCGGGGCGCACATTTTGGATTTTTGGTGCGGGG-  
TTTGAGCACCTC-TATCTTT-GATAAGCGTGACCCGCTCG--CAACACTATCCAAAA-----CTCGCT-  
TGCCCCGCCATCACATTTTC-----TA-CCCCCTGCATTGCTTC-----CATTGGCAGAAC-----  
GTGATACTGACTG-ACCTATCATTATAGCCGCTGAGCTCGGTAAGGGTTCCTTCAAGTA-----  
-----  
-----  
-----  
-----CTTTCTGGTGCGTACTCGA--CCTCGT-----CACCACATCGATCGA-----  
CGCGACATAACGATTCCGCGACTGTGATACTGATTCCAATTCTAGGCAGACCATTCTGGCGAGCACGGC  
CTTGATAGCAATGGCGTGTACGTA-----CCTATCATCC-CATCCTCGCG-----  
CGTCAGGACCTCCCCAAACTGACCT-  
CAGCTTAGCTACAACGGTACCTCCGAGCTCCAGCTCGAGCGTATGAACGTCTACTTCAACGAGGTATGTC  
CACAT-----CAAGA-----TCTCGTCAATCTCGAA-  
TTCAATACGAATTTACCCTATCGCCGAGCT--TGC-TCTGACGCGCT---  
TCCATCATTCAGGCATCCGGCAACAAATATGTTCTCGCGCCGTCCTTGTGATCTCGAGCCCGGTACCA  
TGGACGCCGTCCGTGCCGGTCTTTTCGGACAGCTGTTCCGTCCCGACAACCTCGTTTTTCGGTCAGTCC-  
GTGCTGGCA--CACTGGGCCAAGGT  
>Pseudoplagiostoma\_variabale\_CBS\_113067  
-----G---  
GCCCCGAGTTGTAATTTGCAGAGGATGCTTCTGGCGCGGTGCCTTCCGAGTTCCCTGGAACGGGACGCCAT  
AGAGGGTGAGAGCCCCGATGGATGGACACCAAGCCTGTGTGAAGCTCCTTCAACGAGTCGAGTAGTTTG  
GGAATGCTGCTCTAAATGGGAGGTAAATCTTCTTCTAAAGCTAAATACCGGCCAGAGACCGATAGCGCACA  
AGTAGAGTGATCGAAAGATGAAAAGCACCTTGAAAAGGGGGTTAAATAGTACGTGAAATTGTTGAAAGGG  
AAGCGCTTGTGACCAGACTTGCGCCAGGCGGCTCATCCGGGTTCTCCCCGGTGCACTCCGCTG-  
GCTCAGGCCAGCATCGGTTCTTGTGGGGGATAAGACCAGTGGGAACGTAGCTC-CCTACGGG-  
GAGTGTTATAGCCATTGTACGATACCCTCGCGGGACCGAGGACCGCGCTTCG-----  
GCAAGGATGCTGGCGTAATGGTCACCAGCGACCCGCTCTGAAACACGGACCAAGGAGTCGTCCATTAGAG  
CGAGCGTTTGGGTGTCAAACCCGCACGCGTAATGAAAGTGAAAT-----  
TAGGTGAGAGCTTCGGCGCATCATCGACCGATCCTGATGTTCTCGGATGGATTTGAGTAAGAGTTTAAAC  
GGACGGACCCGAAAGACAGTGAACCTATGCTTGTATAGGTGAAGCCAGAGGAAACTCTGGTGGAGGCTCG  
CAGCGGTTCTGACGTGCA-----  
---TCTCCGTTGGTGAACCAGCGGAGGGATCATTGCTGGAA-GCGTCTCACGGCGACCCAG---AT---  
ACCCTTTGTGAACCTATAAC--CTTCTGTTGCCTCGGCGCAGGCTGGGCGCTTCCACACGCCCC--  
ACGAGGCCTAAACCCCTGTGCGGAGC-----CAGCCGGCCGGTGGCCACA--  
ACCAAACCTCTTG-TTTTTAC--CACCCGTCTC-TCTGAGTA-ACCAAAC---  
AAATGAATCAAACTTTCAACAACGATCTCTTGGTTCTGGCATCGATGAAGAACGCAGCGAAATGCGAT  
AAGTAATGTGAATTGCAGAATTCAGTGAATCATCGAATCTTTGAACGCACATTGCGCCCGCTGGTATTCC  
AGCGGGCATGCCTGTTTCGAGCGTCATTTACCCCTC---AAGCTCCG-----  
---CTTGGTGTGGGGCACT--GCCG-----CGCCGCTTCGGCG-----  
AGGACGGCCCCCAAATCCAGTGGCGAGCTCGCCAGGA---CTCCGAGCGTAGTAGTT-----  
ATTACCTCGCTA--TGGACGGACTGGCGGTGCTT-TGCCGTTAAC--CCCCCAATTTCT----  
GAAAAGTGACCTCGGG-----



-----GAAGGTATGTGTCAAGATCTCCATCT---TTATCAATCCTACATC--  
CCGAATTTTCAT-TTTTGAATG--AGGAGCCAGCATGTC---ATCGCAGCCTGTACCGCTGT-  
GCTTCTCATCCATTCA-TTTTGTCCCGCGGGGCGCACATTTTGGATTTTGGTGCGGG-  
TTTGAGCATATC-TATCTTT-GATAAGCGTGACCCGCTCG--CAACACCATCCAAAA-----CTCGCT-  
TGCCCCGCCATCACACTTTC-----TA-CCCCTGCATTGCTTA----CATTGGTAGAAC-----  
GTGATACTAATTG-ATTTACCATTACAGCCGCTGAGCTTGGTAAGGGTTCCTTCAAGTA-----

-----CTTTCTGGTGCGTACTCGA--CCTCGT-----CACCACATCGATCGA-----  
CGCGACATAACGATTCCGCGACTGTGATACTGATTCAAATTCTAGGCAGACCATTCTGGCGAGCACGGC  
CTTGACAGCAATGGCGTGACGTA-----CCTATCATCC-CATCCTCGCG-----  
CGTCATGACCTCCCCAAACTGACCT-  
CAGCTTAGCTACAACGGTACCTCCGAGCTCCAGCTCGAGCGTATGAACGTCTACTTCAACGAGGTATGTC  
CACAT-----AAAGA-----TCTCACCAATCTCGAA-  
TTGAATACGAATTCACCCTATCGCCGAGCT--TTT-TCTGACGCGCT---  
TCCATTATCCAGGCATCCGGCAATAAATATGTTCTCGCGCGTCCTTGTGATCTCGAGCCCGGTACCA  
TGGACGCCGTCCGTGCCGTCCTTTTCGGACAGCTGTTCCGTCCCGACAACCTCGTTTTTCGGTCAGTCC-  
GTGCTGGCA--CACTGGGCCAAGGT

>Pseudoplagiostoma\_corymbiicola\_CBS\_145052

CGAGTGAAAGCGGCAACAGCTCAAATTTGAAATCTGGCTTCG--  
GCCCCGAGTTGTAATTTGCAGAGGATGCTTCTGGCGCGGTGCCTTCCGAGTTCCTGGAACGGGACGCCAT  
AGAGGGTGAGAGCCCCGTATGGATGGACACCAAGCCTGTGTGAAGCTCCTTCAACGAGTCGAGTAGTTTG  
GGAATGCTGCTCTAAATGGGAGGTAAATCTCTTCTAAAGCTAAATACCGCCAGAGACCGATAGCGCACA  
AGTAGAGTGATCGAAAGATGAAAAGCACCTTGAAGGGGGTTAAATAGTACGTGAAATTGTTGAAAGGG  
AAGCGCTTGTGACCAGACTTGCGCCAGGCGGCTCATCCGGGGTTCTCCCCGGTGCACTCCGCCTG-  
GCTCAGGCCAGCATCGGTTCTTGTGGGGGATAAGACCAGTGGGAACGTAGCTC-TCTACGGG-  
GAGTGTTATAGCCCATTTGTACGATACCCTCGCGGGGACCGAGGACCGCGCTTCG----  
GCAAGGATGCTGACGTAATGGTCACCAGCGACCCGTCTTGAAACACGGACCAAGGAGTCGTCCATTAGAG  
CGAGCGTTTGGGTGTCAAACCCGCACGCGTAATGAAAGTGAAAT-----  
TAGGTGAGAGCTTCGGCGCATCATCGACCGATCCTGATGTTCTCGGATGGATTTGAGTAAGAGTTTAAAC  
GGACGGACCCGAAAGACAGTGAACCTATGCTTGTATAGGTGAAGCCAGAGGAAACTCTGGTGGAGGCTCG  
CAGCGGTTCTGACGTGCAAATCGATCGTCAAATATGAGCATGGGGGCGAAAGACTAATCGAA-----  
--TCTCCGTTGGTGAACCAGCGGAGGGATCATTGCTGGAA-GCGTTTCACGGCGCACCAG---AT--  
ACCCTTTGTGAACCTATACC--CTTCTGTGCCTCGGCGCAGGCTGGGCGCTTCCACACGCCCC--

ACGCAGGCCTAAACCCCTGTGCGGAGC-----CAGCCGGCCGGTGGCCCCAA-  
CCAAAACCTCTGTTTTTAC--AACCCGTCTC-TCTGAGCA-ACCAAAAC---  
AAATGAATCAAACTTTCAACAACGGATCTCTTGGTTCTGGCATCGATGAAGAACGCAGCGAAATGCGAT  
AAGTAATGTGAATTGCAGAATTCAGTGAATCATCGAATCTTTGAACGCACATTGCGCCCGCTGGTATTCC  
AGCGGGCATGCCTGTTTCGAGCGTCATTTACCCCTC----AAGCTCCG-----  
---CTTGGTGTGGGGCACT--GCCG-----CGCCGCTTCGGCG-----  
AGGCAGGCCCCAAATGCAGTGGCGAGCTCGCCAGGA---CTCCGAGCGTAGTAGTT-----  
ACTCACCTCGCTA--TGGACGGAAGTGGCGGTGCTT-TGCCGTTAAA--CCCCCAATTTCTG---  
AAAAGTTGACCTCGGATCAGGTAGGAATACCCGCTGAACTTAA-----

-----GAAGGTATGTGTCAAGATCTCTATTT--GTATCAATCCTATACC--  
ATGAATTTCA--CTTTGAATG--AGGCGCCAGCATGTC--ATCGCAGCCTGTGCCGCTGT-  
GCTTCTCATCCACTCATTTTTTGGCCGCGGGGCGCACATTTTGGATTTTTGGTGCGGG-  
TTTGAGCACCTC-TATCTTT-GATAAGCGTGACCCGCCTCA--CAACACCATCCAAAA-----CTCGCT-  
TGCCCCGCCATCACACTTC-----TACCCCTGCATTGCTTC---CATTGGTAGACC-----  
TTGATACTAATTG-  
ATTTACCATTACAGCCGCTGAGCTCGGTAAGGGTTCCTTCAAGTACGCATGGGTCTTGACAAGCTCAAG  
GCCGAGCGTGAGCGTGGTATCACCATCGACATTGCTCTGTGGAAGTTCGAGACTCCCAAGTACTATGTCA  
CCGTCATTGGTATGTCTATCATCCGCTTCTGTCTGCGAT-CCTGGAAAGCTTTTGCTAACGAT-----

CCCACCTCCCAGACGCTCCCGGTCACCGTGATTTTCATCAAGAACATGCTTTCTGGTGCGTACTCGA--  
CCTCGT-----CACCACATCGATCGA-----  
CGCGACATAACGATTCCGCGACTGTGATACTGATTCCAATTCTAGGCAGACCATTCTGGCGAGCACGGC  
CTCGACAGCAATGGCGGTGTACGTA-----CCTATCATCC-CATCCTCGTG-----  
CGTCATGACCTCCCCAAACTGACCT-  
CAGCTTAGCTACAACGGTACCTCCGAGCTCCAGCTCGAGCGTATGAACGTCTACTTCAACGAGGTATGTC  
CACAT-----AAAGA-----

TCTCATCAATCTCGA-----  
-----ATTG-----

>Pseudoplagiostoma\_mangiferae\_KUMCC\_18\_0179

-----G-----  
GCCCAGATTGTAATTTGCAGAGGATGCTTCTGGTGCGGTGCCTTCCGAGTTCCCTGGAACGGGACGCCAT  
AGAGGGTGAGAGCCCCGTATGGATGGACACCAAGCCTGTGTGAAGCTCCTTCAACGAGTCGAGTAGTTTG  
GGAATGCTGCTCAAAATGGGAGGTAAATCTTCTAAAGCTAAATACCGCCAGAGACCGATAGCGCACA  
AGTAGAGTGATCGAAAGATGAAAAGCACCTTGAAAAGGGGTTAAATAGTACGTGAAATTGTTGAAAGGG

AAGCGCTTGTGACCAGACTTGCGCCAGGCGGCTCATCCGGTGTCTCACCGGTGCACCTCCGCTG-  
GCCCAGGCCAGCATCGGTTCTCGCGGGGGGATAAGAACGGCGGGAACGTGGCTC-CTCACGGG-  
GAGTGTTATAGCCCACCGTACGATACCTTCGCGGGGACCGAGGTTTCGCGCATCT-----  
GCAAGGATGCTGGCGTAATGGTCAACCAGCGACCCGTCTTGAAACACGGACCAAGGAGTCGTCCATTAGAG  
CGAGCGTTTGGGTGTCAAACCCGCACGCGTAATGAAAGTGAAAT-----  
TAGGTGAGAGCTTCGGCGCATCATCGACCGATCCTGATGTTCTCGGATGGATTTGAGTAAGAGTTTTAAC  
GGACGGACCCGAAAGACAGTGAACTATGCTTGATAGGGTGAAGCCAGAGGAAACTCTGGTGGAGGCTCG  
CAGCGGTTCTGACGTGCAAATCGATCGTCAAATATGAGCATGGGGGCGAAAGACTAATCGAA-----  
--TCTCCGTTGGTGAACCAGCGGAGGGATCATTGCTGGAACGCGTCTCACGGCGACCCAG---AT--  
ACCCTATGTGAACTCATACCTTTTTCTGTTGCCTCGGCGCAGGCTGGGAGCTTCTGTAAACTCCCCCAG  
CGGGCC--AACCCTCCACGCGGAGC-----AGGCCCGCCGGCGGCCCCCA--  
ACCAAACCTCTTTGTTTTAAC----TGTATCTCTTCTGAGCA--  
ACAACAAAAAAATGAATCAAACTTTCAACAACGGATCTCTTGTTCTGGCATCGATGAAGAACGCAGC  
GAAATGCGATAAGTAATGTGAATTGCAGAATTCAGTGAATCATCGAATCTTTGAACGCACATTGCGCCCCG  
CTGGTATTCCAGCGGGCATGCCTGTTTCGAGCGTCATTTC AACCCCTC----CAGCCTCG-----  
-----CTGGGTGTTGGGGCACG--GCCG-----CTGCTTTCAGCGG-----  
---AGGCCGGCCCTGAAATACAGTGGCGAGCTCGCTAGGA---CTCCGAGCGTAGTAGTT-----  
TTCAACCTCGCTA--TGGACGGCTAGCGGTGCC--TGCCGTAAAA--CCCCCAATTTCTG-----

-----  
>Pseudoplagiostoma\_myracrodruonis\_URM\_7799

-----GAAGCGGCAACAGCTCAAATTTGAAATCTGGCCTTG---  
CCCCGAGTTGTAATTTGCAGAGGATGCTTCTGGCGCGGTGCCTTCCGAGTTCCTTGGAACGGGACGCCAT  
AGAGGGTGAGAGCCCCGTATGGTTGGCCACCAAGTCTGTGTGAAGGTCCCTTCAACGAGTCGAGTAGTTTG  
GGAATGCTGCTCAAAATGGGAGGTAAATCTCTTCTAAAGCTAAATACCGGCCAGAGACCGATAGCGCACA  
AGTAGAGTGATCGAAAGATGAAAAGCACCTTGAAGGGGGTTAAATAGTACGTGAAATTGTTGAAAGGG  
AAGCGCTTGTGACCAGACTTGCGCCAGGCGGCTCATCCGGCGTTCTCGCCGGTGCACTCCGCCTG-  
GCCCAGGCCAGCATCGGTTTTCGCGGGGGGATAAGAACGGTGGGAACGTGGCTC-CTCACGGG-  
GAGTGTTATAGCCCGCCGTACGATACCCTCGCGGGGACCGAGGTTGCGCATCT-----  
GCAAGGATGCTGGCGTAATGGTCACCAGCGACCCGTCTTGAAACACGGACCAAGGAGTCGTCCATTAGAG  
CGAGCGTTTGGGTGTTAAACCCGCACGCGTAATGAAAGTGAAAT-----  
TAGGTGAGAGCTTCGGCGCATCATCGACCGATCCTGATGTTCTCGGATGGATTTGAGTAAGAGTTTAAAC  
GGACGGACCCGAAAGACAGTGAAGTATGCTTGAATAGGGTGAAGCCAGAGGAAACTCTGGTGGAGGCTCG  
CAGCGGTTCTGACGTGCAAATCGATCGTCAAA-----  
--TCTCCGTTGGTGAACCAGCGAGGGATCATTGCTGGAA-GCGTCTCACGACGCACCCAG---AC--  
ACCCTTTGTGAACATATACC--  
ACTCTGTTGCCTCGGCGCGTGCTGGGGGCGCTGCAATGTGCCCTCCCGTCTCCCTG---  
CCGCTCTGCGGTGCGGGGGCGCG-----CGGCCCGCGGTGGCCC-----ACTTAACTTA---  
TTTTGAC--AACCAGTCTCTTCTGAGTA-ATCATTAT---  
CAATGAATCAAACTTTCAACAACGGATCTCTTGGTTCTGGCATCGATGAAGAACGCAGCGAAATGCGAT  
AAGTAATGTGAATTGCAGAATTCAGTGAATCATCGAATCTTTGAACGCACATTGCGCCCGCTGGTATTCC  
GGCGGGCATGCCTGTTTCGAGCGTCATTCAACCCCTC---AAGCCCAG-----  
---CTTGGTGTGGGGCACT--GCTG-----CCTGCATTGCGAGG-----  
GGGCAGGCTCTGAAATTTAGTGGCGAGCTCGCCAGGA---CTCCGAGCGTAGTAGTC-----  
AATCACCTCGCTT--AGGAAG-----  
-----  
GGGTCAACGGCTGAGCCTATCAAAGATTTGATGGTGCA-----  
ACGGAATATGGAAGTGCTAGAG-----GAGTATGAACCC-----GGCAGCAGC-----  
-----CCCGATGCAACCAAGATTTTCATTAAACGGCACCTGGGTGGGCGTGATAACGA-----  
-----GCCT--GCTCATCTTGTGAGCCT--  
GGTCCAAGAGCTTCGGCGGAGATGCATTATCTCCACGAAGTTTCTCTTGTTCGTGATATCCGTGACCGC  
GAGTTCAAGATCTTTTCCGATGCGGGACGTGTGATGCGACCATTTGTTGTAGTGAATCAACAAGATAATC  
CCGACACCGGGCTTGCGCAGGTACATTGGCTTTGACCAAGAACACATCAGCCGCCTCGAGCAGGACGC  
CAATCTCGACAAGGACGATGAAGAATACTTTGGCTGGGACGGAATCCAGAACAAATGGTGTATTGAGTAC  
CTCGATGCCGAAGAAGAGGAGAGTGCCATGATTTGCATGAGTCCCGAA-----  
GACCTAGAAGACTTCCGTCAGCGAAAAGCACGTCCCAAAGACTACCAAGAAGAGGAAGTTTGGATGATG  
-GTAG-----  
GAGCCCGAACGCTCGTGTGGAGGGTATGTACTGATCTCTTCAAAAAAATATCCATCACG-----  
AAAGATATCACACTC-----AGCTGCGACATTGGC---GTCAAGGCTGGGT-----  
AACACTCAAATCCGGGTTTTCCAC-----CGCACAAATTTGGTTTTTCAGTGCGGGG- TTTGG---  
CGTCTTATC--A-GATAAACGTGACCCACACTGG-CCAAACGAGTCGGAA-----ATAACC-  
AACCCCGTCATTCCAAT-----C-----AATTCGTA-----  
TCAATGCTAAC-----TCATTACAGCCGCTGAGCTCGGTAAGGGTTCCTTCAAGTA-----

-----  
-----  
-----  
-----  
-----  
CTATATCTGGCGAGCATGGCCTCGACAGCAATGGCGGTACGTAACCTGTTCCCTGCTGTTCTC--  
GCTATCGCG-----TGTCT--ACAGCTTCG-TACTGACCA-  
TGATACAGCTACAACGGCACATCCGAGCTCCAGCTCGAGCGCATGAACGTCTACTTCAATGAGGTATGTT  
AACAT-----AGAAC-----CCCAGCCAACGACGGT-  
GTAGGCGTCAATTGTGAGTTGAATGAAGCT--  
TGGTCTTAACGTGTTCTTTTTGTGCAATAGGCATCCGGCAACAAGTACGTCCCTCGCGCTGTCCTCGTCCG  
ATCTCGAGCCCGGTACCATGGACGCCGTCCGCGCCGGTCTTTTCGGCCAGCTATCCGTCCCAGCAACTT  
CGTCTTTGGCCAGTCTGGTGGTGGAAACAACCTGGGCCAAGGG  
>Pseudoplagiostoma\_myraodruonis\_URM\_8123  
-----GAAGCGGCAACAGCTCAAATTTGAAATCTGGCCTTG--  
GCCCCGAGTTGTAATTTGCAGAGGATGCTTCTGGCGCGGTGCCTTCCGAGTTCCTTGAACGGGACGCCAT  
AGAGGGTGAGAGCCCCGATGGTTGGCCACCAAGTCTGTGTGAAGGTCCCTTCAACGAGTCGAGTAGTTTG  
GGAATGCTGCTCAAAATGGGAGGTAAATCTCTTCTAAAGCTAAATACCGCCAGAGACCGATAGCGCACA  
AGTAGAGTGATCGAAAGATGAAAAGCACCTTGAAGGGGGTTAAATAGTACGTGAAATTGTTGAAAGGG  
AAGCGCTTGTGACCAGACTTGCGCCAGGCGGCTCATCCGGCGTTCGCGCGGTGCACTCCGCCTG-  
GCCCAGGCCAGCATCGGTTTTTCGCGGGGGGATAAGAACGGTGGGAACGTGGCTC-CTCACGGG-  
GAGTGTTATAGCCCGCCGTACGATACCCTCGCGGGGACCGAGGTTGCGCGCATCT-----  
GCAAGGATGCTGGCGTAATGGTCACCAGCGACCCGCTTTGAAACACGGACCAAGGAGTCGTCCATTAGAG  
CGAGCGTTTGGGTGTTAAACCCGCACGCGTAATGAAAGTGAAAT-----  
TAGGTGAGAGCTTCGGCGCATCATCGACCGATCCTGATGTTCTCGGATGGATTTGAGTAAGAGTTTAAAC  
GGACGGACCCGAAAGACAGTGAACCTATGCTTGAATAGGGTGAAGCCAGAGGAAACTCTGGTGGAGGCTCG  
CAGCGGTTCTGACGTGCAAATCGATCGTCAAA-----  
--TCTCCGTTGGTGAACCAGCGGAGGGATCATTGCTGGAA-GCGTCTCACGACGCACCCAG---AC--  
ACCCTTTGTGAACATATACC--  
ACTCTGTTGCCTCGGCGCGTGTCTGGGGCGCTGCAATGTGCCCTCCCGTCTCCCTG---  
CCGCTCTGCGGTGCGGGGCGGCG-----CGGCCCGCGGTGGCCC-----ACTTAACTNTA--  
TTTTGAC--AACCAGTCTCTTCTGAGTA-ATCATTAT---  
CAATGAATCAAACTTTCAACAACGGATCTCTTGGTTCTGGCATCGATGAAGAACGCAGCGAAATGCGAT  
AAGTAATGTGAATTGCAGAATTCAGTGAATCATCGAATCTTTGAACGCACATTGCGCCCGCTGGTATTCC  
GGCGGGCATGCCTGTTTCGAGCGTCATTTCAACCCTC----AAGCCCAG-----  
---CTTGGTGTGGGGCACT--GCTG-----CCTGCATTGCGAGG-----  
GGGCAGGCTCTGAAATTTAGTGGCGAGCTCGCCAGGA---CTCCGAGCGTAGTAGTC-----  
AATCACCTCGCTT--AGGAAG-----  
-----  
GGGTCAACGGCTGAGCCTATCAAAGATTTGATGGTGCA-----  
ACCGAATATGGAAGTGCTAGAG-----GAGTATGAACCC-----GGCAGCAGC-----  
-----CCCGATGCAACCAAGATTTTCATTAACGGCACCTGGGTGGGCGTGCATAACGA-----  
-----GCCT--GCTCATCTTGTGAGCCT--  
GGTCCAAGAGCTTCGGCGGAGATGCATTATCTCCACGAAGTTTCTTGTTCGTGATATCCGTGACCGC

GAGTTCAAGATCTTTCCGATGCGGGACGTGTGATGCGACCATTGTTTGTAGTGAATCAACAAGATAATC  
 CCGACACCGGGCTTGCGCAGGGTACATTGGCTTTGACCAAAGAACACATCAGCCGCCTCGAGCAGGACGC  
 CAATCTCGACAAGGACGATGAAGAATACTTTGGCTGGGACGGAAGTCCAGAACATGGTGTATTGAGTAC  
 CTCGATGCCGAAGAAGAGGAGAGTGCCATGATTTGCATGAGTCCCGAA-----  
 GACCTAGAAGACTTCCGTCAGCGAAAAGCACGTCCCAAAGACTACCAAGAAGAGGAAGTTTGGATGATG  
 -GTAG-----  
 GAGCCCGAACGCTCGTGTGGAGGGTATGTACTGATCTCTTCCAAAAAATATCCATCACG-----  
 AAAGATATCACACTC-----AGCTGCGACATTGGC---GTCAAGGCTGGGT-----  
 AACACTCAAATCCGGGTTTTCCAC-----CGCACAAATTTGGTTTTTCAGTGCGGGG-TTTGG---  
 CGTCTTATC--A-GATAAACGTGACCCACACTG-GCCAAACGAGTCGGAA-----ATAACC-  
 AACCCCGTCATTCCACT-----C---AATTCGTA-----  
 TCAATGCTAAC-----TCATTACAGCCGCTGAGCTCGGTAAGGGTTCCTTCAAGTA-----  
 -----  
 -----  
 -----  
 -----  
 -----  
 CTATATCTGGCGAGCATGGCCTCGACAGCAATGGCGTGTACGTAACCTGTTCCCTGCTGTTC--  
 GCTATCGCG-----TGTCT--ACAGCTTCG-TACTGACCA-  
 TGATACAGCTACAACGGCACATCCGAGCTCCAGCTCGAGCGCATGAACGTCTACTTCAATGAGGTATGTT  
 AACAT-----AGAAC-----CCCAGCCAACGACGGT-  
 GTAGGCGTCAATTGTGAGTTGAATGAAGCT--  
 TGGTCTTAACGTGTTCTTTTGTGCAATAGGCATCCGGCAACAAGTACGTCCCTCGCGCTGTCTCGTCG  
 ATCTCGAGCCCGGTACCATGGACGCCGTCCGCGCCGGTCTTTTCGGCCAGCTATTCCGTCCCAGCAACT  
 CGTCTTTGGCCAGTCTGGTGTGGAACAACCTGGGCCAAGGG  
 >Pseudoplagiostoma\_dipterocarpi\_TBRC\_1895  
 CGAGTGAAGCGGCAACAGCTCAAATTTGAAATCTGGCTTCG--  
 GCCCGAGTTGTAATTTGCAGAGGATGCTTCTGGCGCGGTGCCTTCCGAGTTCCCTGGAACGGGACGCCAT  
 AGAGGGTGAGAGCCCGTATGGATGGACACCAAGCCTGTGTGAAGCTCCTTCAACGAGTCGAGTAGTTTG  
 GGAATGCTGCTCTAAATGGGAGGTAAATCTCTTCTAAAGCTAAATACCGCCAGAGACCGATAGCGCACA  
 AGTAGAGTGATCGAAAGATGAAAAGCACCTTGAAAAGGGGGTTAAATAGTACGTGAAATTGTTGAAAGGG  
 AAGCGCTTGTGACCAGACTTGCGCCAGGCGGCTCATCCGGGGTTCTCCCGGTGCACTCCGCCTG-  
 GCTCAGGCCAGCATCGGTTCTTGCGGGGGGATAAGACCAGTGGAACGTAGTCT-TCTACGGG-  
 GAGTGTTATAGCCATTGTACGATACCCTCGCGGGGACCGAGGACCGCGCTTCG----  
 GCAAGGATGCTGGCGTAATGGTCACCAGCGACCCGTCTTGAAACACGGACCAAGGAGTCGTCCATTAGAG  
 CGAGCGTTTGGGTGTCAAACCCGCACGCGTAATGAAAGTGAAAT-----  
 TAGGTGAGAGCTTCGGCGCATCATCGACCGATCCTGATGTTCTCGGATGGATTTGAGTAAGAGTTTAAAC  
 GGACGGACCCGAAAGACAGTGAAGTATGCTTGTATAGGTGAAGCCAGAGGAACTCTGGTGGAGGCTCG  
 CAGCGGTTCTGACGTGCAAATCGATCGTCAAATATGAGCATGGGGGCGAAAGACTAATCGAACTGTCTAG  
 TA-----CATTGCTGGAA-GCGTCTCACGGCGCACCCAG---AT--  
 ACCCTTTGTGAACTTATACC--  
 TATCTGTTGCCTCGGCGCAGGCTGGGAGCTTCTGTAAACTCCCCACGCGGACTCA---  
 CCTCCGCGCGGAGC-----CGGCCCGCGGTGGCCC-----TACCAACTCTTG-  
 TTTTAT----AGTGTCTCTTCTGAGTT---

ACAAAACAAAATGAATCAAAACTTTCAACAACGGATCTCTTGGTTCTGGCATCGATGAAGAACGCAGCG  
AAATGCGATAAGTAATGTGAATTGCAGAATTCAGTGAATCATCGAATCTTTGAACGCACATTGCGCCCGC  
TGGTATTCCAGCGGGCATGCCTGTTGAGCGTCATTTCAACCCTC-----AAGCTCTG-----  
-----CTTGGTGTGGGGCGCG--GCCG-----CTCCCTCGGGG-----  
--AGGCCAGCCCTGAAATCTAGTGCGAGCTCGCTAGGA--CTCCGAGCGTAGTAGTT-----  
TTTAACCTCGCTA--TGGACGGACT-----

>Pseudoplagiostoma castaneae SAUCCmy0162

[illegible]



CATGGACGCCGTCGGTGCCGGTCCCTTCGGCCAGCTGTTCCGCCCCGACAACTTCGTCTTCGGCCAGTCC  
GGTGCTGGCAACAACTGGGCCAAGGG

>Pseudoplagiostoma\_castaneae\_SAUCMy0523

-----G-----

GCCCCGAGTTGTAATTTGCAGAGGATGTTTCTGGCGCGGTGCCTTCCGAGTTCCTTGAACGGGACGCCAT  
AGAGGGTGAGAGCCCCGTATGGTTGGATACCAAGCCTGTGTGAAACTCCTTCGACGAGTCGAGTAGTTTG  
GGAATGCTGCTCTAAATGGGAGGTAAATCTCTTCTAAAGCTAAATACCGGCCAGAGACCGATAGCGCACA  
AGTAGAGTGATCGAAAGATGAAAAGCACCTTGAAAAGGGGGTTAAATAGTACGTGAAATTGTTGAAAGGG  
AAGCGTTTATGACCAGACTTGTGCCAGGCGGTTTCATCCGGCGTTCTCGCCGGTGCACTCCGCCTG--  
GCTCAGGCCAGCATCGGTTTCCGTGGGGGGATAAGAACGGTGGAACGTGGCTC--TTCACGGG--  
GAGTGTTATAGCCCGCCGTACGATACCCTCGTGGGGACCGAGGTTTCGCGCATCT-----  
GCAAGGATGCTGGCATAATGGTCATCAGCGACCCGTCTTGAAACACGGACCAAGGAGTCGTCCATTAGAG  
CGAGCGTTTGGGTGTCAAACCCGCACGCGTAATGAAAGTGAAAT-----  
TAGGTGAGAGCTTCGGCGCATCATCGACCGATCCTGATGTTCTCGGATGGATTTAGTAAGAGTTTAAAC  
GGACGGACCCGAAAGACAGTGAACATGCTTGTATAGGGTGAAGCCAGAGGAAACTCTGGTGGAGGCTCG  
CAGCGGTTCTGACGTGCA-----

--TCTCCGTTGGTGAACCAGCGGAGGGATCATTGCTGGAA--GCGTCTCACGGCGCACCCAG---AA--  
ACCCATGTGAACTTATACC--

ACTTTGTTGCCTCGGCGCGAGCCGGGGGCTTCTATAAGCCCCCCTTA-----

CCTCGGTAAGGAGC-----AGGCCCGCCGGCGGCC-----TATAAACTCTTG--  
TTTT-----AACGTATCTCTTCTGAGTA-----

CAAATTATAAATGAATCAAACTTTCAACAACGGATCTCTTGGTTCTGGCATCGATGAAGAACGCAGCGA  
AATGCGATAAGTAATGTGAATTGCAGAATTCAGTGAATCATCGAATCTTTGAACGCACATTGCGCCCGCT  
GGTATTCAGCGGGCATGCCTGTTTCGAGCGTCATTTCAACCCTC-----AAGCCCTG-----  
-----CTTGGTGTTGGGGCGCT--GCCG-----CTCCCTCGGGAG-----  
-AGGCAGGCCCTGAAATCTAGTGGCGAGCTCGCCAGGA--CTCCGAGCGTAGTAGTT-----  
TACAACCTCGCTT--AGGAAGGACTGGCGGTGCC--TGCCGTTAAA-----

-----  
GGATCACCAGCTGAGCCTATCAAGGACTTTATGGTGCA-----

GCGGAATATGGAAGTATTGGAG-----GAATACGAGCCT-----GGTAGCAGT-----  
-----CCTGATGCCACCAAGATTTTCATCAATGGTACTTGGGTTGGCGTGACAATGA-----  
-----ACCT--GCCACCTGGTCAGCCT--

CGTGCAAGAGCTTCGACGGAGATGCATTATTTCTCACGAGGTCTCCCTTGTCGGTGATATCCGGGACCGT  
GAATTCAAGATTTTCTCGGATGCCGGTCGTGCATGCGACCTTTGTTCTGGTTAATCAGCAAGACAATC  
CTGAAACTGGAGCGGTACCGGGTACACTGGCTCTGACCAAGGACCATATCAGCCGCCTTGAGCAAGATGC  
TGGCCTCGAGAAGGATGATGAAGACTACTTCGGCTGGGATGGGTTGCAAAATAGTGGTGTTATCGAATAC  
CTCGATGCCGAGGAAGAAGAGAGTGCAATGATCTGCATGACCCCTGAA-----

GATCTAGAAGATTATCGCCAGAAGAAGGCTCGACCAAAAAGGTGCCAGGAAGACGAGACCGAGGATGACG  
-GAAG-----GAGTCTGAACGCCCGTGTGAGGGTACGTATTGATCTCCC-----  
ATATTCCCTCATCTCCC--ATGAATACC-----TAGGAAAACAGTCGCGATTCAATT--ATCGTGA--  
CTGCTTCGCCTT--ACCCCTCTACACATTTTTT-----CAAGCGCACATTTTGG--  
TTTTTGGTGGGGGTTTTGGTCCTTTCTTATCTCA--GATAAACGTGACCCACCTCCG--  
CCACCACTACCAGAAGGCCTCTTCCT--TCCCCTTCCTGCATTACCAC-----  
CCTACCCCTACATTTGGCCTGATTGTTGGTTGCA-----

[illegible]

-----  
-----  
-----  
-----  
-----  
-----  
-----  
-----  
-----  
-----  
-----GAAGGTACGTGTTACAAACCTATC-----  
ATCTCAATCCAGCACCGTCTAAAATCCAAAC-----TGTCGCAATACTCCC---  
ATCGTGGGCAGTCTCACTTT-GCTGCTCTTCCCTCATTTTTGA--  
GGCGGGGCGCACATTTTGGATTTTGGTGCGGGG-TTGATCACCTCTTATCTCT-  
GATAAGCGTGGCCCACC-----  
-----  
-----CAACGA-----  
-----  
-----  
-----  
-----TTCGATCGATCGA-----  
CGCGACATAATCGTGCTGTACGCTCGTACTGACCCCGACTACAGGCAGACCATCTCTGGCGAGCACGGT  
CTTGACAGCAATGGCGTGTACGTA-----CCTGCCATCC-TAACATCTCG-----TGTC--  
TCTGCTCCG-  
TGCTGACCCAAGACTCAGTTACAACGGTACCTCCGAGCTCCAGCTCGAGCGTATGAACGTCTACTTCAAC  
GAGGTATGTTATTG-----CCATT-----  
GCCTTTCTGGTGCTTCGCTGAGCGCGGGCTGCCTTGT-----TCTAACGCGCT-----  
TCTGCCAGGCTTCCGGCAACAAGTATGTTCTCGCGCGTCTCGTCTCGATCTCGAGCCCGGTACCATGG  
ACGCCGTCCGTGCTGGTCCTTTGGTCAGCTTTTCCGTCCCGACAACTTCGTTTTCGGCCAGTCCGGTGC  
CGGCAACAACCTGGGCCAAGGG  
>Pseudoplagiostoma\_dipterocarpicola\_MFLUCC\_21\_0114  
CGAGTGAAGCGGCAACAGCTCAAATTTGAAATCTGGCTTCG--  
GCCCCGAGTTGTAATTTGCAGAGGATGCTTCTGGCGCGGTGCCTTCCGAGTTCCCTGGAACGGGACGCCAT  
AGAGGGTGAGAGCCCCGTATGGATGGACACCAAGCCTGTGTGAAGCTCCTTCGACGAGTGCAGTAGTTTG  
GGAATGCTGCTCTAAATGGGAGGTAAATCTTCTTCTAAAGCTAAATACCGCCAGAGACCGATAGCGCACA  
AGTAGAGTGATCGAAAGATGAAAAGCACCTTGAAAAGGGGGTTAAATAGTACGTGAAATTGTTGAAAGGG  
AAGCGCTTGTGACCAGACTTGCGCCAGGCGGCTCATCCGGTGTTCACCGGTGCACTCCGCCTG-  
GCTCAGGCCAGCATCGGTTCTCGCGGGGGGATAAGAACGGCGGGAACGTAGCTT-CCTACGGG-  
GAGTGTTATAGCCCGCCGTACGATACCTTCGCGGGGACCGAGGTTTCGCGCATCT----  
GCAAGGATGCTGGCGTAATGGTCACCAGCGACCCGTCTTGAAACACGGACCAAGGAGTCGTCCATTAGAG  
CGAGCGTTTGGGTGTCAAACCCGCACGCGTAATGAAAGTGAAAT-----  
TAGGTGAGAGCTTCGGCGCATCATCGACCGATCCTGATGTTCTCGGATGGATTTGAGTAAGAGTTTAAAC  
GGACGGACCCGAAAGACAGTGAACCTATGCTTGTATAGGTGAAGCCAGAGGAACTCTGGTGGAGGCTCG  
CAGCGGTTCTGACGTGCAAATCGATCGTCAAATATGAGCATGGGGGCGAAAGACTAATCGAACT-----  
-----GCGGAGGGATCATTGCTGGAACGCGTCTCACGGCGCACCCAG---AT--  
ACCCTATGTGAACCTATACC--  
TCTCTGTTGCCTCGGCGCAGGCTGGGAGCTTCTGTAAACTCCCCACGCGGACCTCAACCCTCCGCGCGG  
AGC-----CGGCCCGCCGGTGGCCC-----TACCAACTCTTG-TTTTTAC-----

[illegible]

GCTCAGGCCACGATCGATTTTTCGCGGGGGACAAAAGCTTCGGGAACGTGGCTC-TCTTCGGG-  
 GAGTGTATAGCCCGTTGCGTAATACCCCGCGGGGATCGAGGACCGCGCTTCG----  
 GCAAGGATGCTGGCGTAATGGTCATCAGCGACCCGTCTTGAAACACGGACCGAGGAGTCAAGCATTAGTG  
 CGAGTGTTTGGGTGTAAAACCCGCACGCGTAATGAAAGTGAACG-----  
 TAGGTGAGAGCTTCGGCGCATCATCGACCGATCCTGATGTTTTTCGGATGGATTGAGTAGGAGCATTAAC  
 GCTTGGACCCGAAAGATGGTGAACATACTTGAATAGGGTGAAGCCAGAGGAACTCTGGTGGAGGCTCG  
 CAGCGGTTCTGACGTGCAAATCGATCGTCAAATTTGAGTATAGGGGCGAAAGACTAATCGAACCATCTAG  
 -----ATCATTACA-----GAGTTGAAAAAC---TCCAA-----  
 CCCCTGTGTACCTTACCT--TTATCGTTGCTTCGGCGGAGG-----  
 ----AGTCCCCCGGGGGAGGGCG-----CCGCCGAGGT-----  
 CACAAACTCTGA-ATTT-----ACAGTGTATC-TCTGAGGA-AAAAAAC---AAAT-  
 AATTAATAACTTTCAACAACGGATCTCTTGTTCTGGCATCGATGAAGAACGCAGCGAAATGCGATAAGTA  
 ATGTGAATTGCAGAATTCAGTGAATCATCGAATCTTTGAACGCACATTGCGCCCGCCGGTATTCGGGCGG  
 GCATGCCTGTTTCGAGCGTCATTTCACTC-----AAGCCAG-----  
 CTTGGTGTGTTGGGGCACCCGGCCG-----CCCAGCGCTTCGG-----  
 GGCCCCCAAGTACATCGGCGGACCCGCTGGGG---  
 CCCTGAGCGCAGTAACCTCGCGGTAAAACGCGCTCGCTCGGTGGATCCCCGAGGGCATTCCAGCCGCTA  
 AA-CCCCCTAATTTTCTT---AGGTTGACCTCGGATCAGGTAGGAATACC-----  
 TGGACGCCATCCGGACACGC-----  
 GACCCCAAGGTGCGCTTCGCCC GGTCTGGGCAATGTGCAAGGACAAGAAGTTTGCGAAAACGAAACTA  
 CGAAGAAGGGTGGCGACAAAGAGGGGTTTGAAGTCGTAAAAACCCAGGTCACCAAGGTGC---  
 CGCACGGTGGCTGTGGCAGCGCGCACCCCGACATCCGTCAGAAGGCCTTGGCGCTCTTTGCCAGGGTAAA  
 GGGCGAGAACAACGACGAGGAAG-----GCGGCCAAAAGA-----AGGAGATCAAGGA-----  
 ----CAAGCCTATCTCGGCCG-AGACGGCCATGCCATCTT-----  
 CAAGAAGATCTCAGATGAGGACCTGT---GGAACATGGGC-CTGAACAAGGACTACGC---  
 GCGCCCCGAGTGGCTTA-----TCGTACGG-----  
 TTCTTCCGTTCTCTCCTCCTCCAGTACGGC-----CTAGTATCTCTATG-----  
 GACGGTACAGGCACGGGCATGCGAAACGAGGACGATTTGACATACAAGCTCGGCGACATCA-----  
 TCCGTGCCAACGGAACGTGAAGCAGGCGATCCAAGATGGCGCGCCGGCCACATCTGCCTCGAGTTCGA  
 GGAGTTGCTGC-----

-----  
-----  
>Pseudoplagiostoma\_alsophilae\_SAUCC\_WZ0451  
CGAGTGAAGCGGCAACAGCTCAAATTTGAAATCTGGCTTCG--  
GCCCCGAGTTGTAATTTGCAGAGGATGCTTCTGGCGCGGTGCCTTCCGAGTTCCTTGGAACGGGACGCCAC  
AGAGGGTGAGAGCCCCGTATGGATGGACACCAAGCCTGTGTGAAGCTCCTTCGACGAGTCGAGTAGTTTG  
GGAATGCTGCTCTAAATGGGAGGTAAATCTCTTCTAAAGCTAAATACCGGCCAGAGACCGATAGCGCACA  
AGTAGAGTGATCGAAAGATGAAAAGCACCTTGAAAAGGGGGTTAAATAGTACGTGAAATTGTTGAAAAGGG  
AAGCGCTTGTGACCAGACTTGCGCCAGGCGGCTCACCCGGTGTTCACCGGTGCACTCCGCCTG-  
GCTCAGGCCAGCATCGGTTCTCGCGGGGGACAAGAACGGTGGGAACGTAGCTC-CTCACGGG-  
GAGTGTTATAGCCCGCCGTACGATACCTTCGCGGGGACCGAGGTTGCGGCATCT-----  
GCTAGGATGCTGGCGTAATGGTCACCAGCGACCCGTCTTGAAACACGGACCAAGGAGTCGTCCATTAGAG  
CGAGCGTTTGGGTGTCAAACCCGCACGCGTAATGAAAGTGAAAT-----  
TAGGTGAGAGCTTCGGCGCATCATCGACCGATCCTGATGTTCTCGGATGGATTTGAGTAAGAGTTTAAAC  
GGACGGACCCGAAAGACAGTGAACCTATGCTTGTATAGGTTGAAGCCAGAGGAAACTCTGGTGGAGGCTCG  
CAGCGGTTCTGACGTGCAAATCGATCGTCAAATATGAGCATGGGGGCGAAAGACTAATCGAACTGTCTAG  
TATCTCCGTTGGTGAACCAGCGGAGGGATCATTGCTGGAA-GCGTCTCACGGCGCACCCAG---AT--  
ACCCTTTGTGAACCTATACC--  
TCTCTGTTGCCTCGGCGCAGGCTGGGAGCTTCTGTAAACTCCCCACGCGGACTCG---  
CCTCCGCGCGGAGC-----AGGCCCGCGGCGGCCCAA--  
CCCAACCTCTTTGTTTTTAT----AGTGTCTCTTCTGAGTA---  
ACAAACAAAAAATGAATCAAACTTTCAACAACGGATCTCTTGGTTCTGGCATCGATGAAGAACGCAGCG  
AAATGCGATAAGTAATGTGAATTGCAGAAATCAGTGAATCATCGAATCTTTGAACGCACATTGCGCCCCG  
TGGTATTCCAGCGGGCATGCCTGTTTCGAGCGTCATTTCAACCCTC----AAGCTCTG-----  
-----CTTGGTGTGGGGCACT--  
GCTGGCCCTGCCGCCCTCCTCCGGGGGGGACGGACAGGA--  
GGGACGGCCCTGAAATACAGTGGCGGGCTCGTAGGA---CTCCGAGCGTAGTAGTTT-----  
TACCACCTCGCTA--TGGACGGACTGGCGGTGCTC-TGCCGTA AAA--CCCCCAATTTCTG---  
AAAAGTTGACCTCGGATCAGGTAGGAATACCCGCTGAACTTAAGGATCACCGGCTGAGCCCATCAAAGAT  
TTCATGGTACA-----GCGGAACATGGAAGTGTGGAG-----GAGTATGAACCC-----  
-----GGCAGCAGT-----  
CCTGATGCCACCAAAATCTTCATCAACGGTACATGGGTGCGGTTTCATAACGA-----  
ACCG--GCGCACCTGGTCAGTCT--  
TGTGCAGGAGCTTCGGCGAAGATGTATCATCTCGCACGAGTTTCGCTTGTTCGTGATATCCGTGACCGT  
GAGTTCAAGATCTTCTCAGACGCCGGGCGGTGATGCGACCTTTGTTCTGTGGTCAATCAACAGGACAACC  
CGGAGACCGGAGCAGTGCAAGGCTCCTTGGCCTTGAGCAAGGAACACATCACCCGCCTTGAACAAGATGC  
TGGTCTTGACAAGGATGACGATGAGTACTTTGGTTGGGACGGCTTGCAAGAACCGGTGTCATCGAGTAC  
CTCGATGCCGAGGAGGAAGAGACTGCAATGATTTGCATGACCCCTGAG-----  
GATCTGGAGGATTACCGACAGCGGAAGCTTCGGCCAAAGGACATGCAAGATGAAGAGCTTGAGGACGACG  
-GCCG-----  
GAGCTTGAACGCTCGTGTGCAAGGTACGTGACAATATTTCCCTACACAACCTCAAATTCAGCCCC--  
GCGAAATCCTCACTACAAAGAACAAACCGCCGACACCCT---GCCGCGGCCTGTTTGGTCCG-  
CCTACCCACCCACCTAATTTTT-TGCGCGGGGCGCACACATTGGA-TTTTGGTGCGGGG-  
TTTTATCATCTC-TATCTTT-GATAAGCGTGACCCACCACG--CTGCCCTCCCTGACA-----

CTGCTGCTGTTTCATCACACTC-----C-----AATTGGCAAGACCG-----  
 --ACGATGCTAACTC--  
 AATTGTTACTACAGCCGCTGAACTCGGTAAGGGTTCCTTCAAGTACGCATGGGTCCCTTGACAAGCTCAAG  
 GCCGAGCGTGAGCGTGGTATCACCATCGACATTGCTCTGTGGAAGTTCGAAACTCCTAAGTACTATGTCA  
 CCGTCATCGGTATGTGCGATCGCCTTTTCTCGTCAGTCTGC-----AATACGAGCTAACCGA-----  
 -----  
 AGTCCAATCCAGACGCTCCCGGTACCGTGATTTTCATCAAGAACATGCTTTCTGGTGCGTACTCGA--  
 CCTCGC-----CACTTGATCGATTGA-----  
 CGCGACGTAGCGATGTCACGACATTCACTGATTACAATTCTAGGCAAACCATCTCTGGCGAGCACGGC  
 CTCGACAGCAATGGCGGTGTACGTG-----CCTGCCAACA-TACAACTGCG-----TGTC---  
 GCCGCTGAAGTACTGACCG--  
 AAGCTCAGCTACAATGGTACCTCCGAGCTCCAGCTCGAGCGTATGAACGTCTACTTCAACGAGGTATGTT  
 CGCA-----AGA-----ACTCACCGTCCACGTC--  
 CCGGGCACGAATCGCCACTATCGCCCAGGC--TCC-TCTAACGCGCT--  
 CTATTTTGTGTAGGCTTCCGGCAACAAGTATGTTCCCTCGCGCCGTCCCTCGTCGATCTCGAGCCCGGTACC  
 ATGGACGCCGTCCGTGCCGGTCCTTTTCGGTCAGCTGTTCCGTCCCGACAACCTTCGTTTTCGGCCAGTCCG  
 GTGCTGGCAACAACGTG-----  
 >Pseudoplagiostoma\_alsophilae\_SAUCW\_Z0152  
 CGAGTGAAGCGGCAACAGCTCAAATTTGAAATCTGGCTTCG--  
 GCGCGAGTTGTAATTTGCAGAGGATGCTTCTGGCGCGGTGCCTTCCGAGTTCCTTGGAAACGGGACGCCAC  
 AGAGGGTGAGAGCCCGTATGGATGGACACCAAGCCTGTGTGAAGTCTTCGACGAGTTCGAGTAGTTTG  
 GGAATGCTGCTCTAAATGGGAGGTAAATCTCTTCTAAAGCTAAATACCGGCCAGAGACCGATAGCGCACA  
 AGTAGAGTGATCGAAAGATGAAAAGCACCTTGAAAAGGGGGTTAAATAGTACGTGAAATTGTTGAAAGGG  
 AAGCGCTTGTGACCAGACTTGCGCCAGGCGGCTCACCCGGTGTCTCACCGGTGCACTCCGCTG--  
 GCTCAGGCCAGCATCGGTTCTCGCGGGGGACAAGAACGGTGGGAACGTAGCTC-CTCACGGG-  
 GAGTGTTATAGCCCGCGTACGATACCTTCGCGGGGACCGAGGTTTCGCGCATCT-----  
 GCTAGGATGCTGGCGTAATGGTCACCAGCGACCCGTCTTGAAACACGGACCAAGGAGTCGTCCATTAGAG  
 CGAGCGTTTGGGTGTCAAACCCGCACGCGTAATGAAAGTGAAAT-----  
 TAGGTGAGAGCTTCGGCGCATCATCGACCGATCCTGATGTTCTCGGATGGATTGAGTAAGAGTTTAAAC  
 GGACGGACCCGAAAGACAGTGAACATATGCTTGTATAGGTGAAGCCAGAGGAAACTCTGGTGGAGGCTCG  
 CAGCGGTTCTGACGTGAAATCGATCGTCAAATATGAGCATGGGGGCGAAAGACTAATCGAACTGTCTAG  
 TATCTCCGTTGGTGAACAGCGGAGGGATCATTGCTGGAA-GCGTCTCACGGCGCACCCAG---AT--  
 ACCCTTTGTGAACCTATACC--  
 TCTCTGTTGCCCTGGCGCAGGCTGGGAGCTTCTGTAAACTCCCCACGCGGACTCG---  
 CCTCCGCGCGGAGC-----AGGCCCGCCGGCGGCCCAA--  
 CCCAACCTCTTTGTTTTAT---AGTGTCTCTTCTGAGTA---  
 ACAAACAAAAATGAATCAAACTTTCAACAACGGATCTCTTGGTTCTGGCATCGATGAAGAACGCAGCG  
 AAATGCGATAAGTAATGTGAATTGCAGAAATTCAGTGAATCATCGAATCTTTGAACGCACATTGCGCCCGC  
 TGGTATTCCAGCGGGCATGCCTGTTTCGAGCGTCATTCAACCCTC----AAGCTCTG-----  
 -----CTTGGTGTGGGGCACT--  
 GCTGGCCCTGCCGCCCTCCTCCGGGGGGACGGACAGGA--  
 GGGCAGGCCCTGAAATACAGTGGCGGGCTCGCTAGGA---CTCCGAGCGTAGTAGTTT-----  
 TACCACCTCGCTA--TGGACGGAAGTGGCGGTGCTC-TGCCGTAAAA--CCCCCAATTTCTG---  
 AAAAGTTGACCTCGGATCAGGTAGGAATACCCGCTGAACTTAAGGATCACCGGCTGAGCCCATCAAAGAT

TTCATGGTACA-----GCGGAACATGGAAGTGCTGGAG-----GAGTATGAACCC-----  
-----GGCAGCAGT-----  
CCTGATGCCACCAAAATCTTCATCAACGGTACATGGGTCGGCGTTCATAACGA-----  
ACCG--GCGCACCTGGTCAGTCT--  
TGTGCAGGAGCTTCGGCGAAGATGTATCATCTCGCACGAGGTTTCGCTTGTTCGTGATATCCGTGACCGT  
GAGTTCAAGATCTTCTCAGACGCCGGGCGCGTGATGCGACCTTTGTTTCGTGGTCAATCAACAGGACAACC  
CGGAGACCGGAGCAGTGCAAGGCTCCTTGGCCTTGAGCAAGGAACACATCACCCGCCTTGAACAAGATGC  
TGGTCTTGACAAGGATGACGATGAGTACTTTGGTTGGGACGGCTTGCAAGAACAACGGTGTATCGAGTAC  
CTCGATGCCGAGGAGGAAGAGACTGCAATGATTTGCATGACCCCTGAG-----  
GATCTGGAGGATTACCGACAGCGGAAGCTTCGGCCAAAGGACATGCAAGATGAAGAGCTTGAGGACGACG  
--GCCG-----  
GAGCTTGAACGCTCGTGTGCAAGGTACGTGACAATATTTCCCTACACAACCTCAAATTCAGCCCC--  
GCGAAATCCTCACTACAAAGAAACAACCGCGACACCCT--GCCGCGCCTGTTTGGTCCG--  
CCTACCCACCCACCTAATTTTT--TCGGCGGGGCGCACACTTTGGA--TTTTGGTGCGGG--  
TTTGATCATCTC--TATCTTT--GATAAGCGTGACCCACCACG--CTGCCCTCCCTGACA-----  
CTGCTGCTGTTTCATCACACTC-----C----AATTGGCAAGACCG-----  
--ACGATGCTAACT--  
AATTGTTACTACAGCCGCTGAACTCGGTAAGGGTTCCTTCAAGTACGCATGGGTCTTGACAAGCTCAAG  
GCCGAGCGTGAGCGTGGTATCACCATCGACATTGCTCTGTGGAAGTTCGAACTCCTAAGTACTATGTCA  
CCGTCATCGGTATGTGCGATCGCCTTTTCTCGTCAGTCTGC-----AATACGAGCTAACCGA-----  
-----  
AGTCCAATCCAGACGCTCCCGGTCACCGTGATTTTCATCAAGAACATGCTTTCTGGTGCGTACTCGA--  
CCTCGC-----CACTTGATCGATTGA-----  
CGCGACGTAGCGATGTACGACATTCACTGATTACAATTCTAGGCAAACCATCTCTGGCGAGCACGGC  
CTCGACAGCAATGGCGGTGTACGTG-----CCTGCCAACA--TACAACTGCG-----TGTC-----  
GCCGCTGAAGTACTGACCG--  
AAGCTCAGCTACAATGGTACCTCCGAGCTCCAGCTCGAGCGTATGAACGTCTACTTCAACGAGGTATGTT  
CGCA-----AGA-----ACTCACCGTCCACGTC--  
CCGGGCACGAATCGCCACTATCGCCCAGGC--TCC--TCTAACGCGCT--  
CTATTTTGTGTAGGCTTCCGGCAACAAGTATGTTTCTCGCGCGTCCCTCGTCGATCTCGAGCCCGGTACC  
ATGGACGCCGTCCGTGCCGTCCTTTTCGGTCAGCTGTTCCGTCCCGACAACCTTCGTTTTCGGCCAGTCCG  
GTGCTGGCAACAACCTG-----  
>Pseudoplagiostoma\_machilus\_BW0233  
CGAGTGAAGCGGCAACAGCTCAAATTTGAAATCTGGCCTCG--  
GCCCCGAGTTGTAATTTGCAGAGGATGCTTCTGGCGCGGTGCCTTCCGAGTTCCTTGAACGGGACGCCAC  
AGAGGGTGAGAGCCCCGTATGGATGGACACCAAGCCTGTGTGAAGTCTCTCGACGAGTCGAGTAGTTTG  
GGAATGCTGCTCTAAATGGGAGGTAAATCTTTCTAAAGCTAAATACCGCCAGAGACCGATAGCGCACA  
AGTAGAGTGATCGAAAGATGAAAAGCACCTTGAAAAGGGGGTTAAATAGTACGTGAAATTGTTGAAAGGG  
AAGCGCTTGTGACCAGACTTGCGCCAGGCGGCTCATCCGGTGTCTCACCGGTGCACTCCGCCTG--  
GCCCAGGCCAGCATCGGTTCTCGCGGGGGGACAAGAACGGTGGGAACGTAGCTC--CTCACGGG--  
GAGTGTTATAGCCCGCGTACGATACCCTCGCGGGGACCGAGGTTGCGCATCT-----  
GCAAGGATGCTGGCGTAATGGTCACCAGCGACCCGTCTTGAAACACGGACCAAGGAGTCGTCCATTAGAG  
CGAGCGTTTGGGTGTCAAACCCGCACGCGTAATGAAAGTGAAAT-----  
TAGGTGAGAGCTTCGGCGCATCATCGACCGATCCTGATGTTCTCGGATGGATTTGAGTAAGAGTTTAAAC



[illegible]

>Pseudoplagiostoma\_machilus\_BW0221

ACCCGAGTTGTAATTTGCAGAGGATGCTTCTGGCGCGGTGCCTTCCGAGTTCCTGGAACGGGACGCCAC  
 AGAGGGTGAGAGCCCCGTATGGATGGACACCAAGCCTGTGTGAAGCTCCTTCGACGAGTCGAGTAGTTTG  
 GGAATGCTGCTCTAAATGGGAGGTAAATCTCTTCTAAAGCTAAATACCGGCCAGAGACCGATAGCGCACA  
 AGTAGAGTGATCGAAAGATGAAAAGCACCTTGAAAAGGGGGTTAAATAGTACGTGAAATTGTTGAAAGGG  
 AAGCGCTTGTGACCAGACTTGCGCCAGGCGGCTCATCCGGTGTCTCACCGGTGCACTCCGCCTG--  
 GCCCAGGCCAGCATCGGTTCTCGCGGGGGGACAAGAACGGTGGGAACGTAGCTC-CTCACGGG-  
 GAGTGTTATAGCCCGCCGTACGATAACCCTCGCGGGGACCGAGGTTTCGCGCATCT----  
 GCAAGGATGCTGGCGTAATGGTCACCAGCGACCCGTCTTGAAACACGGACCAAGGAGTCGTCCATTAGAG  
 CGAGCGTTTGGGTGTCAAACCCGCACGCGTAATGAAAGTGAAAT-----  
 TAGGTGAGAGCTTCGGCGCATCATCGACCGATCCTGATGTTCTCGGATGGATTTGAGTAAGAGTTTTAAC  
 GGACGGACCCGAAAGACAGTGAACATATGCTTGTATAGGTGAAGCCAGAGGAAACTCTGGTGAGGCTCG  
 CAGCGGTTCTGACGTGCAAATCGATCGTCAAATATGAGCATGGGGGCGAAAGACTAATCGAACTGTCTAG  
 TATCTCCGTTGGTGAACCAGCGGAGGGATCATTGCTGGAA-GCGTCTCACGGCGCGCCAG---GT--  
 ACCCTTTGTGAACTTATAACC--

AATGAATCAAACTTTCAACAACGGATCTCTTGGTTCTGGCATCGATGAAGAACGCAGCGAAATGCGAT  
 ACGTAATGTGAATTGCAGAATTCAGTGAATCATCGAATCTTTGAACGCACATTGCGCCCGCTGGTATTCC  
 AGCGGGCATGCCTGTTTCAGCGTCATTTCAACCCTC-----AAGCTCTG-----  
 ---CTTGGTGTGGGGCCCT--

AAAAGTTGACCTCGGATCAGGTAGGAATACCCGCTGAACTTAA-

[illegible]

ATGACGCTAATAA-

AATTGTTACAACAGCCGCTGAACTCGGTAAGGGTTCCTTCAAGTACGCATGGGTCCTTGACAAGCTCAAG

CCCCGAGCGTGAGCGTGGTATCACCATCGATATTGCTCTGTGGAAGTTCGAGACTCCCAAGTACTATGTCA  
CCGTCATTGGTATGTTGCAATCGCCTTTCTCCCTGTCATTACTGAAAAACACGAGCTAACTGC-----  
-----  
AGTCGAATCTAGACGCTCCCGGTACCGTGACTTCATCAAGAACATGCTTTCTGGTGCGTACTCGACCCC  
TCAC-----CACTTCACGAATCGA-----  
AGCGACGTCGCGATGCCACGACATTCAAACCTGATCCCCATTCTAGGCAAACCATCTCTGGCGAGCATGGC  
CTCGACAGCAATGGCGGTGTACGTA-----CTTGTCATCC-TACAACTGCG-----TGTC----  
ACAGCTTAGATACTGACCG-  
AAGCTCAGCTACAACGGTACCTCGGAGCTCCAGCTCGAGCGTATGAACGTCTACTTCAACGAGGTATGTT  
CGCAG-----AGATT-----  
CCCCGCCACGCTCTCCGGGCGGAATTGCTACTATCGCCAAAGC--TCC-TCTAACGCGCA--  
CCATTTGAGTAGGCCTCCGGCAACAAATATGTTCCCTCGCGCCGTTCTTGTCGATCTCGAGCCCGGTACC  
ATGGACGCCGTGCGCGCCGGTCCTTTCCGGTCAGCTGTTCCGTCCCGACAACCTTCGTTTTCGGCCAGTCCG  
GTGCTGGCAACAACCTGGGCCAAGGG  
>Pseudoplagiostoma\_bamboensis\_SAUC\_1206-4  
CGAGTGAAGCGGCAACAGCTCAAATTTGAAATCTGGCTTCG--  
GCCCCGAGTTGTAATTTGCAGAGGATGCTTCTGGCGCGGTGCCTTCCGAGTTCCTTGAACGGGACGCCAT  
AGAGGGTGAGAGCCCCGATGGATGGACACCAAGCCTGTGTGAAGCTCCTTCAACGAGTCGAGTAGTTTG  
GGAATGCTGCTCTAAATGGGAGGTAAATCTTCTTCTAAAGCTAAATATAGGCCAGAGACCGATAGCGCACA  
AGTAGAGTGATCGAAAGATGAAAAGCACCTTGAAAAGGGGGTTAAATAGTACGTGAAATGTTGAAAAGGG  
AAGCGCTTGTAACAGACTTGTCAGGCGGCTCATCCGGTGTCTCACCAGTGCCTCCGCTG-  
GCTCAGGCCAGCATCGGTTTTCGCGGGGGACAAGAACGGTGGGAACGTGGCTC-CTCTCGGG-  
GAGTGTTATAGCCCGCGTACGATACCCTCGCGGGGACCGAGGTTTCGCGCATCT-----  
GCAAGGATGCTGGCGTAATGGTCACCAGCGACCCGCTTGAAACACGGACCAAGGAGTCGTCCATTAGAG  
CGAGCGTTTGGGTGTCAAACCCGCACGCGTAATGAAAGTGAAAT-----  
TAGGTGAGAGCTTCGGCGCATCATCGACCGATCCTGATGTTCTCGGATGGATTTGAGTAAGAGTTTAAAC  
GGACGGACCCGAAAGACAGTGAACCTATGCTTGATAGGGTGAAGCCAGAGGAACTCTGGTGGAGGCTCG  
CAGCGGTTCTGACGTGCAAATCGATCGTCAAATATGAGCATGGGGGCGAAAGACTAATCGAACTGTCTAG  
TATCTCCGTTGGTGAACCAGCGGAGGGATCATTGCTGGAA-GCGTCTCACGGCGCACCCAG---AT--  
ACCTTTGTGAACC-ATACC--  
TCTCTGTTGCCTCGGCGCAGGCTGGGAGCTTCTGTAAACTCCCCACGCGGACTCA---  
CCTCCGCGCGGAGC-----AGGCCCGCGCGGCCCAA---CCAAACCTCTTG-  
TTTTTAC---AGTGTCTCCTCTGAGTT-ACAAACAC---  
AAATGAATCAAACTTTCAACAACGGATCTCTTGGTCTGGCATCGATGAAGAACGCAGCGAAATGCGAT  
AAGTAATGTGAATTGCAGAATTCAGTGAATCATCGAATCTTTGAACGCACATTGCGCCCGCTGGTATTCC  
AGCGGGCATGCCTGTTTCGAGCGTCATTTCACCCCTC---CAGCTCCG-----  
---CTGGGTGTTGGGGCACT--GCCG-----CCTCCCTCCGGGGAG-----  
AGGCAGGCCCTGAAATACAGTGGCGGGCTCGCTAAGA---CTCTGAGCGTAGTAGTT-----  
TTACACCTCGTTC--TGGACGTGTTAGCGGTGCTCTTGCCGTAAAA--CCCCCAATTTTCTG--  
AAAAGTTGACCTCGGATCAGGTAGGAATACCCGCTGAACTTAA-----  
-----  
-----  
-----  
-----

-----GAAGGTATGTGAAAACATTTCAAAT---CATTCAATCCAGCATC---  
ATGAAATCCCCTCATGAAAAAGATGGGCCCAGAAATCTGTGTGGTGGCCTATTTTGCTTG---  
TGCTCATACACTCAATTTTT---GGCGGAGCGCACATTTTGGA-TTTTGGTGCGGGG-  
TTTGATCACCTC-TATCTGT-  
GATAAGCGTGACCCACCACGAGCAATCCCAACTTGTACCATCATCTCGTCTGCCCCATGTTATATGCGC-  
-----CCTC-----TTTTCTC---AATTGGCTATTTT-----ACGATGCTAACTC-A---  
ATCATTACAGCTGCTGAGCTCGGCAAGGGTTCCTTCAAGTACGCCTGGGTCCCTGACAAGCTCAAGGCCG  
AGCGTGAGCGTGGTATCACCATCGACATTGCTCTGTGGAAGTTCGAGACTCCCAAGTACTATGTCACCGT  
CATTGGTAAGTCGAATTCAGTGTCTGTTCG-----CGGTTGAACCAGCAGCTAACTGT-----  
-----  
GTCTACTTGCAGACGCTCCCGGTCACCGTGACTTCATCAAGAACATGCTTTCTGGTGCGTACTCGA--  
CCACCA-----CATTCTCATATCGG-----  
CGCGACATAACGATATCACGACATTGGTACTGACTTCAACCACAGGCAGACCATCTCTGGCGAGCACGGC  
CTTGACAGCAATGGCGTGACGTA-----CCTGCCATTC-TTCCATCGCG-----TGTT---  
ATCGTAGTCATACTGACCG-  
AAGCTCAGCTACAATGGTACCTCCGAGCTCCAGCTCGAGCGTATGAACGTCTACTTCAATGAGGTGAGTA  
GAAA-----GGAC-----CTCTGTCACTGTGCGC-  
TAGGGCGCACATCGCCACTACTGCTGAGCT--TGT-  
CCTGACGCGTTGCTTCTTTGGTCTAGGCTTCCGGCAACAAGTATGTTCCCGCGCCGTCTCGTCGATCT  
CGAGCCCGGTACCATGGACGCCGTCCGTGCCGTCCCTTCGGCCAGCTTTTCCGTCCCGACAACTTCGTC  
TTCGGCCAGTCCGGTGCTGGCAAACTGGGCCAAGG  
>Pseudoplagiostoma\_bamboensis\_SAUC\_1206-6  
CGAGTGAAGCGGCAACAGCTCAAATTTGAAATCTGGCTTCG--  
GCCCCGAGTTGTAATTTGCAGAGGATGCTTCTGGCGCGGTGCCTTCCGAGTTCCTGGAACGGGACGCCAT  
AGAGGGTGAGAGCCCCGATGGATGGACACCAAGCCTGTGTGAAGCTCCTTCAACGAGTCGAGTAGTTTG  
GGAATGCTGCTCTAAATGGGAGGTAAATCTTCTTAAAGCTAAATATAGGCCAGAGACCGATAGCGCACA  
AGTAGAGTGATCGAAAGATGAAAAGCACCTTGAAAAGGGGGTTAAATAGTACGTGAAATTGTTGAAAGGG  
AAGCGCTTGTGACCAGACTTGTGCCAGGCGGTCTATCCGGTGTTCACCGGTGCACTCCGCCTG-  
GCTCAGGCCAGCATCGGTTTTCGCGGGGGGACAAGAACGGTGGGAACGTGGCTC-CTCTCGGG-  
GAGTGTTATAGCCCGCCGTACGATACCCTCGCGGGGACCGAGGTTTCGCGCATCT-----  
GCAAGGATGCTGGCGTAATGGTCACCAGCGACCCGTCTTGAAACACGGACCAAGGAGTCGTCCATTAGAG  
CGAGCGTTTGGGTGTCAAACCCGCACGCGTAATGAAAGTGAAAT-----  
TAGGTGAGAGCTTCGGCGCATCATCGACCGATCCTGATGTTCTCGGATGGATTTGAGTAAGAGTTTAAAC  
GGACGGACCCGAAAGACAGTGAACATGCTTGTATAGGTGAAGCCAGAGGAACTCTGGTGGAGGCTCG  
CAGCGGTTCTGACGTGCAAATCGATCGTCAAATATGAGCATGGGGGCGAAAGACTAATCGAACTGTCTAG  
TATCTCCGTTGGTGAACCAGCGGAGGGATCATTGCTGGAA-GCGTCTCACGGCGCACCCAG---AT--  
ACCCTTTGTGAACC-ATACC--  
TCTCTGTTGCCTCGGCGCAGGCTGGGAGCTTCTGTAAACTCCCCACGCGGACTCA---  
CCTCCGCGCGGAGC-----AGGCCGCGCGGCGCCAA---CCAAACCTCTTG-

[illegible]
